# Supplementary material for: Future COVID-19 Booster Vaccine Refusal in Healthcare Workers after a Massive Breakthrough Infection Wave, a Nationwide Survey-Based Study
Source: MDPI journal article supplement (doi:10.3390/vaccines11050987), 2023-05-16
Supplement: s1 [file s1]

# **Title: Future COVID-19 Booster Vaccine Refusal in Healthcare Workers after a Massive Breakthrough Infection Wave, a Nationwide Survey-Based Study**

## **Online supplemental material**

1. eMethods: Questionnaire

2. Supplemental Figures.

Figure S1: Self-reported COVID-19 symptoms

Figure S2: Administered COVID-19 vaccines

Figure S3: Post-COVID-19 vaccination adverse effects

3. Supplemental Tables

Table S1: Demographics among participants with different doses

Table S2, Adverse (or side) effects after previous COVID-19 vaccine types

Table S3: Sensitivity analysis limited to those with previous COVID-19

Table S4: Sensitivity analysis excluding those who had received the fourth dose

Table S5. Reasons for future COVID-19 booster vaccine refusal

Table S6: Demographics and characteristics among participants with different profession

## **eMethods: Questionnaire**

### **Introduction:**

Dear healthcare workers, you are invited to participate in a survey regarding your attitudes towards a future COVID-19 booster vaccine. This questionnaire consists 42 items, and will be completed within about 5 minutes. We guarantee this survey is voluntary and anonymous, with no personal data. Many thanks for your contribution.

### **Section 1: Sociodemographics and health status (17 items)**

1. Age \_\_\_\_ (years, continuous variable)
  2. Gender      Male      Female
  3. Height \_\_\_\_ (cm, continuous variable)
  4. Weight \_\_\_\_ (kg, continuous variable)
  5. Martial status      Married      Unmarried      Divorced or widow
  6. Education background      Below bachelor's degree      Bachelor's degree      Postgraduate's degree
  7. Profession      Physician      Nurse      Other staff
  8. Your hospital type      Community hospital      Non-designated hospital      Designated hospital
- Note: Designated hospital = hospital designated for COVID-19 patients
9. Working department      Respiratory      Intensive care unit      Emergency      Others
  10. Years of practice \_\_\_\_ (years, continuous variable)
  11. Had direct COVID-19 patients contact?      Yes      No
  12. Who do you live with? (Multiple choice)      Children      Old people      Dependent      Other people  
Live alone
  13. Do you smoke?      Current smoker      Ex-smoker      Non-smoker
  14. Do you drink?      Regular      Occasional      Never or rare
  15. What's your frequency of physical activity      Often      Seldom      Rare or never
  16. Do you have a history of allergy?      Yes      No
  17. Do you have chronic disease (Multiple choice):      Hypertension;      Hyperlipidemia;      Diabetes;  
Chronic heart disease;      Asthma;      Chronic obstructive pulmonary disease;      Lung nodule;  
Chronic liver disease;      Chronic renal disease;      Tumor;      Insomnia;      Anxiety;  
Depression;      Additional medical history \_\_\_\_ (Please describe)

### **Section 2. Self-report of previous SARS-CoV-2 infection (7 items)**

1. Do your family members have a COVID-19 infection?      Yes      No
  2. Were your family members hospitalized due to COVID-19?      Yes      No
  3. What is your COVID-19 infection status?  
Infected or recovered  
Re-infected  
Not infected
- If you have a previous COVID-19 infection, please respond to items 4 - 7
4. Severity of your previous infection  
Not severe  
Severe but not hospitalized  
Severe and hospitalized
  5. What COVID-19 symptoms did you suffer? (Multiple choice):      Fever;      Cough;      Expectoration;  
Catarrh;      Chest distress;      Dyspnea;      Chestpain;      Myalgia;      Fatigue;      Digestive symptoms;  
Headache;      Insomnia;      Hyposmia;      Hypogeusia;      Anxiety;      Depression

6. Do you have pneumonia caused by previous COVID-19 infection Yes No
7. How long do you recover? \_\_\_\_ (Days, continuous variable)

### **Section 3. Self-report of previous COVID-19 vaccination (4 items)**

1. How many doses did you receive?  
Four doses Three doses Two doses One dose None
2. What type of vaccine have you received?  
Inactivated protein subunit vaccines viral vector vaccines mRNA vaccines
3. Time from your recent vaccination \_\_\_\_ (days, continuous variable)
4. Do you experience post-COVID-19 vaccination adverse effects?  
Local but not severe Systemic but not severe Severe None

Mild to moderate (not severe) local adverse effects include injection site pain, redness, and swelling, without the need for emergency medical care or hospitalization. Mild to moderate (not severe) systemic adverse reactions refer to fever, fatigue, chills, etc, without the need for emergency medical care or hospitalization. Severe side effects refer to those (i.e., shock, severe allergy, thrombosis) that need emergency medical care or hospitalization.

### **Section 4. Self-perception of future COVID-19 risk (4 items)**

1. There will be a future COVID-19 wave in 2023 Agree Uncertain Disagree
2. Future COVID-19 will be similar to flu Agree Uncertain Disagree
- 3 I will get a future COVID-19 in 2023 Agree Uncertain Disagree
4. If I get a future COVID-19 infection, it will be severe Agree Uncertain Disagree

### **Section 5. Attitudes towards a future COVID-19 booster vaccinates (CBV) (10 items)**

1. CBV could terminate COVID-19 pandemic Agree Uncertain Disagree
2. CBV could prevent future COVID-19 infection Agree Uncertain Disagree
3. CBV could prevent future severe COVID-19 Agree Uncertain Disagree
4. CBV is necessary for healthcare workers Agree Uncertain Disagree
5. CBV is necessary for the public Agree Uncertain Disagree
6. I think CBV is safe Agree Uncertain Disagree
7. Are you willing to receive a future CBV? Yes No
8. Reasons for your willingness of receiving a booster vaccination (Multiple choice)  
CBV is effective  
CBV is safe  
Other reasons
9. Type of booster vaccine you are willing to receive (Multiple choice)  
Inactivate COVID-19 vaccines  
Inhalation recombination COVID-19 vaccines  
mRNA vaccines  
viral vector vaccines  
Bivalent COVID-19 vaccine  
Monovalent COVID-19 vaccine
10. Reason for your unwillingness to receive a booster vaccine (Multiple choice)  
Concerns about effectiveness  
Concerns about safety  
Concerns about economical factors  
I think it is not necessary

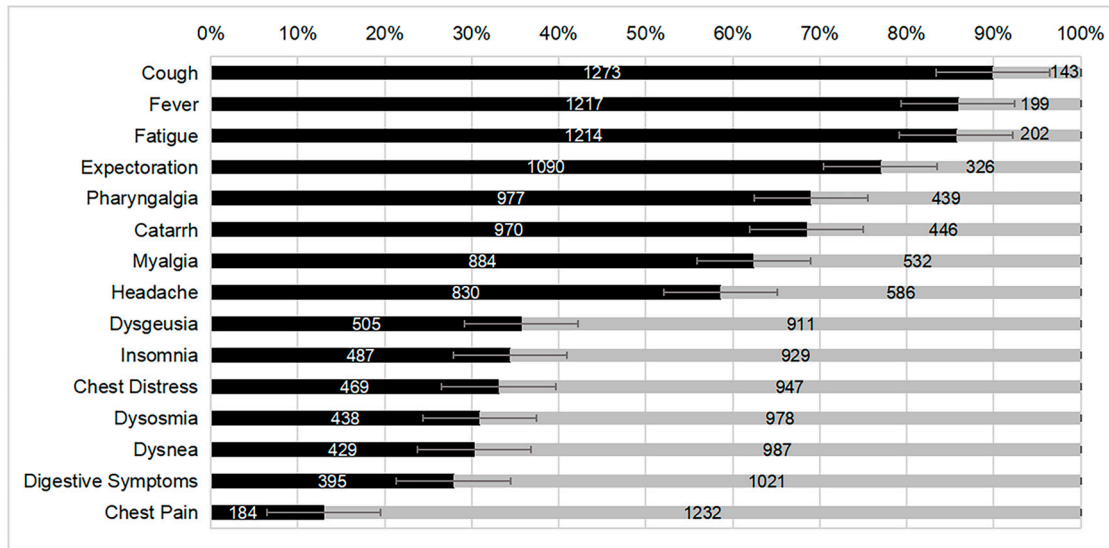

**Figure S1: Self-reported COVID-19 symptoms**

Abbreviation: COVID-19 = coronavirus disease 2019;

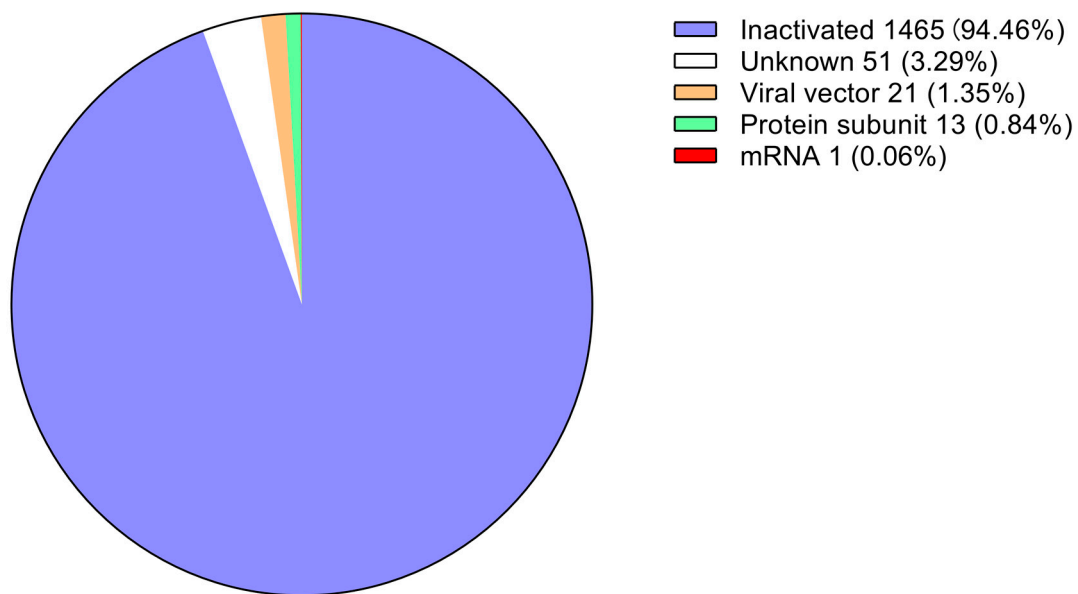

**Figure S2: Administered COVID-19 vaccines**

Abbreviation: COVID-19 = coronavirus disease 2019;

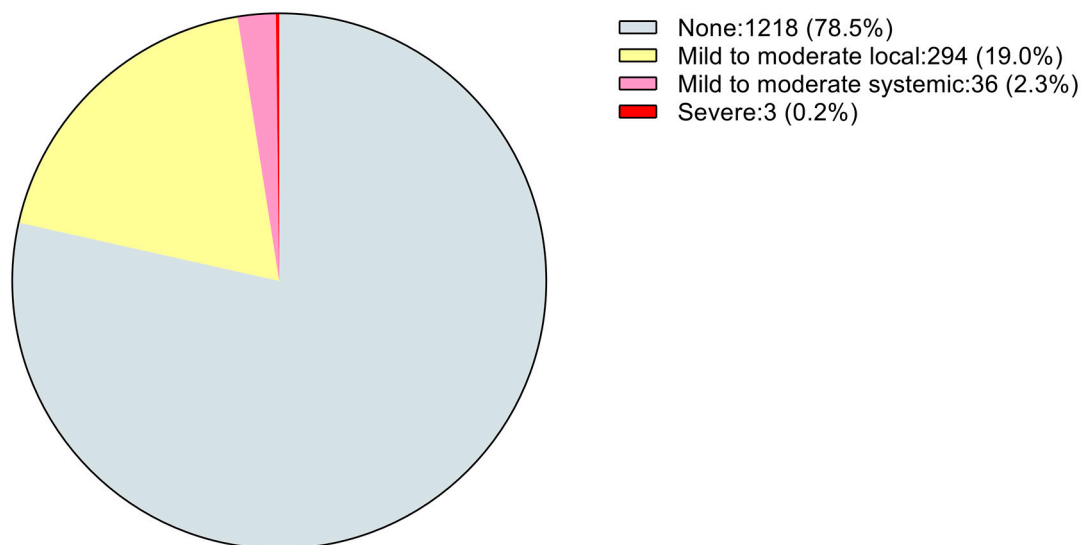

**Figure S3: Post COVID-19 vaccination adverse effects**

Abbreviation: COVID-19 = coronavirus disease 2019;

**Table S1. Demographics among participants with different doses (n = 1618)**

|                                 | Total<br>(n =1618) | Four doses<br>(n = 126) | Three doses<br>(n = 1159) | Two doses<br>(n = 226) | One dose<br>(n = 27) | None<br>(n = 40) |
|---------------------------------|--------------------|-------------------------|---------------------------|------------------------|----------------------|------------------|
| <b>Sociodemographics</b>        |                    |                         |                           |                        |                      |                  |
| Age, y, median (IQR)            | 38 (31 - 46)       | 43 (36 - 48)            | 38 (31 - 46)              | 36 (30 - 43)           | 35 (31 -45)          | 38 (33 - 44)     |
| Female sex, n (%)               | 1046 (64.6)        | 47 (37.3)               | 756 (65.2)                | 191 (71.8)             | 21 (77.8)            | 31 (77.5)        |
| Martial status                  |                    |                         |                           |                        |                      |                  |
| Divorced, n (%)                 | 25 (1.5)           | 1 (0.8)                 | 17 (1.5)                  | 2 (0.8)                | 3 (11.1)             | 2 (5.0)          |
| Unmarried, n (%)                | 332 (20.5)         | 14 (11.1)               | 245 (21.1)                | 62 (23.3)              | 6 (22.2)             | 5 (12.5)         |
| Married, n (%)                  | 1261 (77.9)        | 111 (88.1)              | 897 (77.4)                | 202 (75.9)             | 18 (66.7)            | 33 (82.5)        |
| Live with children, n (%)       | 942 (58.2)         | 84 (66.7)               | 659 (56.9)                | 158 (59.4)             | 14 (51.9)            | 27 (67.5)        |
| Live with old, n (%)            | 778 (48.1)         | 64 (50.8)               | 564 (48.7)                | 119 (44.7)             | 12 (44.4)            | 19 (47.5)        |
| Live alone, n (%)               | 177 (10.9)         | 10 (7.9)                | 125 (10.8)                | 33 (12.4)              | 5 (18.5)             | 4 (10.0)         |
| Live with dependent, n (%)      | 55 (3.4)           | 3 (2.4)                 | 32 (2.8)                  | 17 (6.4)               | 1 (3.7)              | 2 (5.0)          |
| Education                       |                    |                         |                           |                        |                      |                  |
| Below bachelor 's degree, n (%) | 198 (12.2)         | 6 (4.8)                 | 161 (13.9)                | 28 (10.5)              | 2 (7.4)              | 1 (2.5)          |
| Bachelor's degree, n (%)        | 877 (54.2)         | 68 (54.0)               | 645 (55.7)                | 138 (51.9)             | 10 (37.0)            | 16 (40.0)        |
| Postgraduate's degree, n (%)    | 543 (33.6)         | 52 (41.3)               | 353 (30.5)                | 100 (37.6)             | 15 (55.6)            | 23 (57.5)        |
| Type of hospital                |                    |                         |                           |                        |                      |                  |
| Community hospital, n (%)       | 90 (5.6)           | 11 (8.7)                | 68 (5.9)                  | 9 (3.4)                | 1 (3.7)              | 1 (2.5)          |
| Non-designated hospital, n (%)  | 1024 (63.3)        | 73 (57.9)               | 726 (62.6)                | 174 (65.4)             | 21 (77.8)            | 30 (75.0)        |
| Designated hospital, n (%)      | 504 (31.1)         | 42 (33.3)               | 365 (31.5)                | 83 (31.2)              | 5 (18.5)             | 9 (22.5)         |
| Profession                      |                    |                         |                           |                        |                      |                  |
| Physician, n (%)                | 775 (47.9)         | 92 (73.0)               | 518 (44.7)                | 124 (46.6)             | 16 (59.3)            | 25 (62.5)        |
| Nurse, n (%)                    | 491 (30.3)         | 13 (10.3)               | 380 (32.8)                | 82 (30.8)              | 6 (22.2)             | 10 (25.0)        |

|                                             |              |              |              |              |              |              |
|---------------------------------------------|--------------|--------------|--------------|--------------|--------------|--------------|
| Other staff, n (%)                          | 352 (21.8)   | 21 (16.7)    | 261 (22.5)   | 60 (22.6)    | 5 (18.5)     | 5 (12.5)     |
| Department                                  |              |              |              |              |              |              |
| Respiratory, n (%)                          | 42 (2.6)     | 6 (4.8)      | 31 (2.7)     | 2 (0.8)      | 2 (7.4)      | 1 (2.5)      |
| Emergent, n (%)                             | 57 (3.5)     | 5 (4.0)      | 45 (3.9)     | 6 (2.3)      | 1 (3.7)      | 0 (0.0)      |
| Intensive care unit, n (%)                  | 64 (4.0)     | 5 (4.0)      | 48 (4.1)     | 8 (3.0)      | 0 (0.0)      | 3 (7.5)      |
| Others, n (%)                               | 1455 (89.9)  | 110 (87.3)   | 1035 (89.3)  | 250 (94.0)   | 24 (88.9)    | 36 (90.0)    |
| Had direct COVID-19 patients contact, n (%) | 1373 (84.9)  | 112 (88.9)   | 983 (84.8)   | 216 (81.2)   | 25 (92.6)    | 37 (92.5)    |
| Years of practice, y, median (IQR)          | 14 [7 - 23]  | 18 [11 - 24] | 14 [7 -24]   | 11 [5 -20]   | 11 [4 - 20]  | 12 [8 - 20]  |
| <b>Health status</b>                        |              |              |              |              |              |              |
| BMI, kg/m <sup>2</sup> , mean (SD)          | 22.71 (3.03) | 23.62 (2.90) | 22.65 (2.98) | 22.55 (3.25) | 22.12 (3.28) | 22.63 (2.35) |
| Current smoker, n (%)                       | 79 (4.9)     | 12 (9.5)     | 59 (5.1)     | 6 (2.3)      | 1 (3.7)      | 1 (2.5)      |
| Drinker                                     |              |              |              |              |              |              |
| Never or rare, n (%)                        | 1016 (62.8)  | 65 (51.6)    | 723 (62.4)   | 179 (67.3)   | 19 (70.4)    | 30 (75)      |
| Occasional, n (%)                           | 559 (34.5)   | 53 (42.1)    | 405 (34.9)   | 83 (31.2)    | 8 (29.6)     | 10 (25.0)    |
| Regular                                     | 43 (2.7)     | 8 (6.3)      | 31 (2.7)     | 4 (1.5)      | 0            | 0            |
| Frequency of physical activity              |              |              |              |              |              |              |
| Rare or never, n (%)                        | 633 (39.1)   | 47 (37.3)    | 444 (38.3)   | 120 (45.1)   | 9 (33.3)     | 13 (32.5)    |
| Sometimes, n (%)                            | 744 (46.0)   | 56 (44.4)    | 537 (46.3)   | 117 (44.0)   | 13 (48.1)    | 21 (52.5)    |
| Often to frequent, n (%)                    | 241 (14.9)   | 23 (13.8)    | 178 (15.4)   | 29 (10.9)    | 5 (18.5)     | 6 (15.0)     |
| History of allergy, n (%)                   | 152 (9.4)    | 7 (5.6)      | 102 (8.8)    | 32 (12.0)    | 4 (14.8)     | 7 (17.5)     |
| History of chronic disease*, n (%)          | 595 (36.8)   | 56 (44.4)    | 424 (36.6)   | 96 (36.1)    | 9 (33.3)     | 10 (25.0)    |
| <b>Previous COVID-19 history</b>            |              |              |              |              |              |              |
| Previous COVID-19 infection, n (%)          | 1476 (91.7)  | 86 (68.3)    | 1083 (93.4)  | 247 (92.9)   | 25 (92.6)    | 35 (87.5)    |
| COVID - 19 pneumonia, n (%)                 | 72 (15.7)    | 4 (13.3)     | 49 (14.9)    | 15 (19.2)    | 2 (25.0)     | 2 (13.3)     |
| Cohabitation COVID-19 infection             |              |              |              |              |              |              |
| Infected, n (%)                             | 1430 (99.4)  | 102 (80.9)   | 1044 (90.1)  | 229 (86.1)   | 20 (74.0)    | 35 (87.5)    |



|                                  |             |            |             |            |           |           |
|----------------------------------|-------------|------------|-------------|------------|-----------|-----------|
| Unknown, n (%)                   | 64 (4.0)    | 4 (3.2)    | 43 (3.7)    | 13 (4.9)   | 2 (7.4)   | 2 (5.0)   |
| Not infected, n (%)              | 124 (7.7)   | 20 (15.9)  | 72 (6.2)    | 24 (9.0)   | 5 (18.5)  | 3 (7.5)   |
| Family COVID-19 infection        |             |            |             |            |           |           |
| Infected, n (%)                  | 1463 (90.4) | 106 (84.1) | 1062 (91.6) | 236 (88.8) | 23 (85.2) | 36 (90.0) |
| Unknown, n (%)                   | 42 (2.6)    | 4 (3.2)    | 29 (2.5)    | 7 (2.6)    | 1 (3.7)   | 1 (2.5)   |
| Not infected, n (%)              | 113 (7.0)   | 16 (12.7)  | 68 (5.9)    | 23 (8.6)   | 3 (11.1)  | 3 (7.5)   |
| Post-vaccination adverse effects |             |            |             |            |           |           |
| None, n (%)                      | 1267 (78.3) | 100 (79.4) | 924 (79.7)  | 194 (72.9) | 12 (44.4) | 37 (92.5) |
| Local, n (%)                     | 299 (18.5)  | 25 (19.8)  | 209 (18.0)  | 60 (22.6)  | 4 (14.8)  | 1 (2.5)   |
| Systemic or severe, n (%)        | 52 (3.2)    | 1 (0.8)    | 26 (2.2)    | 12 (4.5)   | 11 (40.7) | 2 (5.0)   |

\*Chronic disease = Any of the following: hypertension, hyperlipidemia, diabetes, chronic heart disease, immune disease, and tumor

Abbreviation: BMI = Body mass index; COVID-19 = coronavirus disease 2019; IQR = interquartile range; SD = standard deviation

Table S2, Adverse (or side) effects after previous COVID-19 vaccine types

|          | Inactivated  | Viral vector | Protein subunit | mRNA     | Unknown    |
|----------|--------------|--------------|-----------------|----------|------------|
| None     | 1161 (79.2%) | 8 (38.1%)    | 9 (69.2%)       | 0        | 40 (78.4%) |
| Local    | 267 (18.2%)  | 11 (52.4%)   | 4 (30.8%)       | 1 (100%) | 11 (21.6%) |
| Systemic | 34 (2.3%)    | 2 (9.5%)     | 0               | 0        | 0          |
| Severe   | 3 (0.2%)     | 0            | 0               | 0        | 0          |

**Table S3. Predictors for booster dose refusal in those with previous COVID-19 (n = 1416)**

|                                        | Unadjusted OR [95% CI] | P-value | Adjusted OR [95% CI] | P - value |
|----------------------------------------|------------------------|---------|----------------------|-----------|
| Age                                    | 0.99 [0.98 - 1.00]     | 0.257   | 1.00 [0.98 - 1.02]   | 0.932     |
| Female sex                             | 1.34 [1.07 - 1.68]     | 0.010   | 0.99 [0.65 - 1.50]   | 0.946     |
| Live alone                             | 0.54 [0.37 - 0.78]     | 0.001   | 0.60 [0.34 - 1.07]   | 0.084     |
| Live with old                          | 0.85 [0.68 - 1.04]     | 0.117   | 0.88 [0.65 - 1.20]   | 0.421     |
| Profession                             |                        | <0.001  |                      | 0.011     |
| Other staff                            | Ref                    |         | Ref                  |           |
| Physician                              | 1.02 [0.77 - 1.35]     |         | 1.00 [0.67 - 1.50]   |           |
| Nurse                                  | 1.70 [1.26 - 2.78]     |         | 1.75 [1.14 - 2.70]   |           |
| Frequency of physical activity         |                        | 0.033   |                      | 0.984     |
| Never or rare                          | Ref                    |         | Ref                  |           |
| Sometimes                              | 0.74 [0.59 - 0.93]     |         | 0.99 [0.71 - 1.36]   |           |
| Often to frequent                      | 0.85 [0.61 - 1.17]     |         | 0.96 [0.60 - 1.54]   |           |
| Drinker                                |                        | 0.173   |                      | 0.861     |
| Never                                  | Ref                    |         | Ref                  |           |
| Seldom                                 | 0.84 [0.67 - 1.05]     |         | 0.91 [0.63 - 1.31]   |           |
| Often                                  | 1.34 [0.71 - 2.55]     |         | 1.05 [0.39 - 2.86]   |           |
| History of allergy                     | 1.51 [1.05 - 2.17]     | 0.026   | 1.87 [1.11 - 3.14]   | 0.019     |
| Cohabitant infection                   |                        | 0.032   |                      | 0.193     |
| Not infected                           | Ref                    |         | Ref                  |           |
| Uncertain                              | 0.51 [0.23 - 1.14]     |         | 0.60 [0.20 - 1.74]   |           |
| Infected                               | 1.16 [0.68 - 1.96]     |         | 1.27 [0.61 - 2.65]   |           |
| Post-vaccination adverse effects       |                        | 0.004   |                      | 0.902     |
| None                                   | Ref                    |         | Ref                  |           |
| Local                                  | 1.52 [1.16 - 1.99]     |         | 1.05 [0.72 - 1.55]   |           |
| Sytemic or severe                      | 1.65 [0.85 - 3.21]     |         | 0.84 [0.31 - 2.25]   |           |
| There will be a future wave in 2023    |                        | 0.003   |                      | 0.978     |
| Agree                                  | Ref                    |         | Ref                  |           |
| Uncertain                              | 1.37 [1.09 - 1.73]     |         | 0.97 [0.65 - 1.43]   |           |
| Disagree                               | 1.60 [1.18 - 2.16]     |         | 0.96 [0.59 - 1.56]   |           |
| Future COVID-19 will be similar to flu |                        | 0.131   |                      | 0.732     |
| Agree                                  | Ref                    |         | Ref                  |           |
| Uncertain                              | 1.10 [0.83- 1.45]      |         | 1.18 [0.76 - 1.84]   |           |
| Disagree                               | 1.28 [1.00 - 1.62]     |         | 1.15 [0.76 - 1.75]   |           |
| "I will get a future COVID-19 in 2023" |                        | <0.001  |                      | <0.001    |
| Agree                                  | Ref                    |         | Ref                  |           |
| Uncertain                              | 0.98 [0.78 - 1.24]     |         | 0.92 [0.65 - 1.31]   |           |
| Disagree                               | 1.74 [1.29 - 2.33]     |         | 2.24 [1.40 - 3.60]   |           |
| CBV could terminate                    |                        | <0.001  |                      | 0.113     |

|                                          |                        |        |                      |        |
|------------------------------------------|------------------------|--------|----------------------|--------|
| COVID-19 pandemic                        |                        |        |                      |        |
| Disagree                                 | Ref                    |        | Ref                  |        |
| Uncertain                                | 4.42 [2.67 - 7.32]     |        | 1.18 [0.55 - 2.54]   |        |
| Agree                                    | 2.83 [1.69 - 4.73]     |        | 0.78 [0.36 - 1.70]   |        |
| CBV could prevent future COVID-19        |                        | <0.001 |                      | 0.009  |
| Agree                                    | Ref                    |        | Ref                  |        |
| Uncertain                                | 4.62 [3.30 - 6.46]     |        | 1.53 [0.91 - 2.57]   |        |
| Disagree                                 | 9.39 [6.59 - 13.38]    |        | 2.24 [1.33 - 3.75]   |        |
| CBV could prevent future severe COVID-19 |                        | <0.001 |                      | 0.146  |
| Agree                                    | Ref                    |        | Ref                  |        |
| Uncertain                                | 3.40 [2.67 - 4.33]     |        | 0.96 [0.64 - 1.45]   |        |
| Disagree                                 | 12.11 [8.15 - 17.98]   |        | 1.71 [0.97 - 3.04]   |        |
| I think CBV is safe                      |                        | <0.001 |                      | <0.001 |
| Agree                                    | Ref                    |        | Ref                  |        |
| Uncertain                                | 8.62 [6.72 - 11.07]    |        | 3.73 [2.66 - 5.24]   |        |
| Disagree                                 | 44.36 [13.30 - 147.93] |        | 10.34 [2.17 - 49.23] |        |
| CBV is necessary for healthcare workers  |                        | <0.001 |                      | <0.001 |
| Agree                                    | Ref                    |        | Ref                  |        |
| Uncertain                                | 8.94 [6.68 - 11.96]    |        | 3.08 [2.05 - 4.61]   |        |
| Disagree                                 | 28.30 [19.69 - 40.68]  |        | 6.34 [4.00 - 10.06]  |        |
| CBV is necessary for the public          |                        | <0.001 |                      | <0.001 |
| Agree                                    | Ref                    |        | Ref                  |        |
| Uncertain                                | 15.85 [10.91 - 23.03]  |        | 4.45 [2.66 - 5.24]   |        |
| Disagree                                 | 29.81 [19.50 - 45.56]  |        | 7.62 [4.51 - 12.88]  |        |

Abbreviation: CI = confidence interval; COVID-19 = coronavirus disease 2019; CBV = COVID-19 booster dose vaccine; OR = odds ratio;

**Table S4. Predictors for booster dose refusal in those with two or three doses (n = 1425)**

|                                        | Unadjusted OR [95% CI] | P-value | Adjusted OR [95% CI] | P - value |
|----------------------------------------|------------------------|---------|----------------------|-----------|
| Age                                    | 1.00 [0.99 - 1.01]     | 0.569   | 1.01 [0.99 - 1.03]   | 0.262     |
| Female sex                             | 0.77 [0.61 - 0.96]     | 0.020   | 1.11 [0.73 - 1.69]   | 0.615     |
| Live alone                             | 0.57 [0.40 - 0.81]     | 0.002   | 0.75 [0.43 - 1.29]   | 0.292     |
| Live with old                          | 0.86 [0.70 - 1.06]     | 0.165   | 0.92 [0.68 - 1.25]   | 0.596     |
| Profession                             |                        | <0.001  |                      | 0.014     |
| Other staff                            | Ref                    |         | Ref                  |           |
| Physician                              | 1.14 [0.86 - 1.50]     |         | 1.25 [0.84 - 1.87]   |           |
| Nurse                                  | 1.73 [1.29 - 2.31]     |         | 1.86 [1.22 - 2.83]   |           |
| Frequency of physical activity         |                        | 0.004   |                      | 0.568     |
| Never or rare                          | Ref                    |         | Ref                  |           |
| Sometimes                              | 0.68 [0.54 - 0.85]     |         | 0.85 [0.61 - 1.18]   |           |
| Often to frequent                      | 0.83 [0.60 - 1.14]     |         | 0.83 [0.52 - 1.34]   |           |
| Drinker                                |                        | 0.076   |                      | 0.915     |
| Never or rare                          | Ref                    |         | Ref                  |           |
| Seldom                                 | 0.87 [0.69 - 1.08]     |         | 0.96 [0.66 - 1.38]   |           |
| Regular                                | 1.84 [0.92 - 3.67]     |         | 1.17 [0.40 - 3.43]   |           |
| History of allergy                     | 1.35 [0.94 - 1.92]     | 0.103   | 1.62 [0.97 - 2.70]   | 0.065     |
| Previous COVID-19                      |                        |         | 1.23 [0.65 - 2.34]   | 0.528     |
| Cohabitant infection                   |                        | 0.082   |                      | 0.147     |
| Infected                               | Ref                    |         | Ref                  |           |
| Uncertain                              | 0.64 [0.32 - 1.28]     |         | 0.54 [0.20 - 1.44]   |           |
| Not infected                           | 1.19 [0.78 - 1.82]     |         | 1.19 [0.63 - 2.27]   |           |
| Post-vaccination adverse effects       |                        | 0.001   |                      | 0.970     |
| None                                   | Ref                    |         | Ref                  |           |
| Local                                  | 1.55 [1.18 - 2.02]     |         | 1.04 [0.71 - 1.53]   |           |
| Systemic or severe                     | 1.93 [1.00 - 3.72]     |         | 0.94 [0.36 - 2.49]   |           |
| There will be a future wave in 2023    |                        | 0.003   |                      | 0.726     |
| Agree                                  | Ref                    |         | Ref                  |           |
| Uncertain                              | 1.28 [1.02 - 1.62]     |         | 0.92 [0.62 - 1.36]   |           |
| Disagree                               | 1.67 [1.24 - 2.26]     |         | 1.12 [0.69 - 1.82]   |           |
| Future COVID-19 will be similar to flu |                        | 0.198   |                      | 0.867     |
| Agree                                  | Ref                    |         | Ref                  |           |
| Uncertain                              | 1.17 [0.88 - 1.54]     |         | 1.11 [0.72 - 1.73]   |           |
| Disagree                               | 1.24 [0.98 - 1.57]     |         | 1.02 [0.67 - 1.54]   |           |
| I will get a future COVID-19 in 2023   |                        | <0.001  |                      | <0.001    |
| Agree                                  | Ref                    |         | Ref                  |           |
| Uncertain                              | 0.97 [0.77 - 1.23]     |         | 1.02 [0.72 - 1.45]   |           |

|                                             |                        |        |                     |        |
|---------------------------------------------|------------------------|--------|---------------------|--------|
| Disagree                                    | 1.73 [1.29 - 2.32]     |        | 2.47 [1.53 - 3.99]  |        |
| CBV could terminate<br>COVID-19 pandemic    |                        | <0.001 |                     | 0.119  |
| Disagree                                    | Ref                    |        | Ref                 |        |
| Uncertain                                   | 4.59 [2.80 - 7.53]     |        | 1.09 [0.51 - 2.31]  |        |
| Agree                                       | 2.86 [1.73 - 4.73]     |        | 0.72 [0.33 - 1.56]  |        |
| CBV could prevent future<br>COVID-19        |                        | <0.001 |                     | 0.006  |
| Agree                                       | Ref                    |        | Ref                 |        |
| Uncertain                                   | 4.78 [3.43 - 6.65]     |        | 1.61 [0.96 - 2.69]  |        |
| Disagree                                    | 10.16 [7.15 - 14.45]   |        | 2.34 [1.40 - 3.94]  |        |
| CBV could prevent future<br>severe COVID-19 |                        | <0.001 |                     | 0.049  |
| Agree                                       | Ref                    |        | Ref                 |        |
| Uncertain                                   | 3.53 [2.77 - 4.50]     |        | 0.96 [0.63 - 1.45]  |        |
| Disagree                                    | 13.61 [9.13 - 20.31]   |        | 1.98 [1.11 - 3.54]  |        |
| I think CBV is safe                         |                        | <0.001 |                     | <0.001 |
| Agree                                       | Ref                    |        | Ref                 |        |
| Uncertain                                   | 8.25 [6.45 - 10.56]    |        | 3.45 [2.46 - 4.84]  |        |
| Disagree                                    | 51.23 [15.54 - 168.94] |        | 9.55 [2.12 - 42.95] |        |
| CBV is necessary for<br>healthcare workers  |                        | <0.001 |                     | <0.001 |
| Agree                                       | Ref                    |        | Ref                 |        |
| Uncertain                                   | 9.55 [7.15 - 12.77]    |        | 3.35 [2.24 - 5.00]  |        |
| Disagree                                    | 30.59 [21.20 - 44.15]  |        | 6.32 [3.98 - 10.03] |        |
| CBV is necessary for the<br>public          |                        | <0.001 |                     | <0.001 |
| Agree                                       | Ref                    |        | Ref                 |        |
| Uncertain                                   | 16.55 [11.43 - 23.94]  |        | 4.77 [3.01 - 7.56]  |        |
| Disagree                                    | 30.44 [19.99 - 46.36]  |        | 7.74 [4.59 - 13.04] |        |

Abbreviation: CI = confidence interval; COVID-19 = coronavirus disease 2019; CBV = COVID-19 booster dose vaccine; OR = odds ratio;

**Table S5. Reasons for future COVID-19 booster vaccine refusal**

| Items                                                      | Number | Percentage |
|------------------------------------------------------------|--------|------------|
| Concerns about safety                                      | 101    | 15.6%      |
| Concerns about efficacy                                    | 365    | 56.3%      |
| Concerns about necessity                                   | 161    | 24.8%      |
| Concerns about economic factor                             | 4      | 0.6%       |
| Concerns about other factors (for example, time consuming) | 65     | 10.0%      |

Abbreviation: CI = confidence interval; COVID-19 = coronavirus disease 2019;

**Table S6. Characteristics of participants with different profession (n = 1511)**

|                                         | Nurse<br>(n = 475) | Physician<br>(n = 734) | Other staff<br>(n = 342) | P-value |
|-----------------------------------------|--------------------|------------------------|--------------------------|---------|
| <b>Sociodemographics</b>                |                    |                        |                          |         |
| Age, y, median (IQR)                    | 37 (30 -45)        | 40 (33 - 46)           | 37 (29 - 46)             | 0.001   |
| Female sex, n (%)                       | 469 (98.7)         | 294 (40.1)             | 231 (67.5)               | <0.001  |
| Marital status                          |                    |                        |                          | <0.001  |
| Unmarried, n (%)                        | 83 (17.5)          | 140 (19.1)             | 98 (28.7)                |         |
| Divorced or widowed, n (%)              | 3 (0.6)            | 12 (1.6)               | 5 (1.5)                  |         |
| Married, n (%)                          | 389 (81.9)         | 582 (79.3)             | 239 (69.9)               |         |
| Live with children, n (%)               | 281 (59.2)         | 441 (60.1)             | 179 (52.3)               | 0.048   |
| Live with old, n (%)                    | 237 (49.9)         | 363 (49.5)             | 147 (43.0)               | 0.094   |
| Live alone, n (%)                       | 50 (10.5)          | 68 (9.3)               | 50 (14.6)                | 0.030   |
| Live with dependents, n (%)             | 23 (4.8)           | 21 (2.9)               | 8 (2.3)                  | 0.087   |
| Education                               |                    |                        |                          | <0.001  |
| Below bachelor 's degree, n (%)         | 126 (26.5)         | 12 (1.6)               | 57 (16.7)                |         |
| Bachelor's degree, n (%)                | 348 (73.3)         | 287 (39.1)             | 216 (63.2)               |         |
| Postgraduate's degree, n (%)            | 1 (0.2)            | 435 (59.3)             | 69 (20.2)                |         |
| Types of hospital                       |                    |                        |                          | <0.001  |
| Community hospital, n (%)               | 20 (4.2)           | 35 (4.8)               | 33 (9.6)                 |         |
| Non-designated hospital, n (%)          | 268 (56.4)         | 489 (66.6)             | 216 (63.2)               |         |
| Designated hospital, n (%)              | 187 (39.4)         | 210 (28.6)             | 93 (27.2)                |         |
| Department                              |                    |                        |                          | 0.002   |
| Respiratory, n (%)                      | 16 (3.4)           | 21 (2.9)               | 2 (0.6)                  |         |
| Emergency n (%)                         | 19 (4.0)           | 31 (4.2)               | 6 (1.8)                  |         |
| Intensive care unit, n (%)              | 26 (5.5)           | 30 (4.1)               | 5 (1.5)                  |         |
| Others, n (%)                           | 414 (87.2)         | 652 (88.8)             | 329 (96.2)               |         |
| Years of practice, y median IQR)        | 15 (8 -26)         | 14 (7 - 22)            | 12 (5 -23)               | 0.001   |
| Direct contact COVID-19 patients, n (%) | 427 (89.9)         | 674 (91.8)             | 210 (61.4)               | <0.001  |
| <b>Health status</b>                    |                    |                        |                          |         |
| BMI, kg/m <sup>2</sup> , mean (SD)      | 22.0 (2.9)         | 23.0 (3.3)             | 22.6 (3.8)               | <0.001  |
| Frequency of physical activity          |                    |                        |                          | 0.005   |
| Rare or never, n (%)                    | 220 (46.3)         | 264 (36.0)             | 127 (37.1)               |         |
| Sometimes, n (%)                        | 198 (41.7)         | 353 (48.1)             | 159 (46.5)               |         |
| Often to frequent, n (%)                | 57 (12.0)          | 117 (15.9)             | 56 (16.4)                |         |
| Current smoker, n (%)                   | 0 (0.0)            | 49 (6.7)               | 28 (8.2)                 | <0.001  |
| Regular drinker, n (%)                  | 0 (0.0)            | 32 (4.4)               | 11 (3.2)                 | <0.001  |
| History of allergy, n (%)               | 62 (13.1)          | 56 (7.6)               | 23 (6.7)                 | 0.001   |
| History of chronic disease*, n (%)      | 158 (33.3)         | 302 (41.1)             | 116 (33.9)               | 0.008   |
| <b>Previous COVID-19 history</b>        |                    |                        |                          |         |



|                                              |            |            |            |        |
|----------------------------------------------|------------|------------|------------|--------|
| Previous COVID-19 infection                  | 442 (93.1) | 664 (90.5) | 310 (90.6) | 0.263  |
| COVID-19 Pneumonia, n (%)                    | 29 (6.1)   | 27 (3.7)   | 12 (3.5)   | 0.026  |
| Cohabitation COVID-19 infection              |            |            |            | 0.006  |
| Infection, n(%)                              | 425 (89.5) | 652 (88.8) | 298 (87.1) |        |
| Unknown, n (%)                               | 16 (3.4)   | 29 (4.0)   | 15 (4.4)   |        |
| Not infected, n (%)                          | 34 (7.2)   | 53 (7.2)   | 29 (8.5)   |        |
| Family member infection                      |            |            |            | <0.001 |
| Infected, n(%)                               | 434 (91.4) | 670 (91.2) | 300 (87.8) |        |
| Unknown, n (%)                               | 11 (2.3)   | 16 (2.2)   | 13 (3.8)   |        |
| Not infected, n (%)                          | 30 (6.3)   | 48 (6.5)   | 29 (8.5)   |        |
| Previous vaccination                         |            |            |            |        |
| Vaccine doses, n (%)                         |            |            |            | <0.001 |
| Two to three doses                           | 462 (97.3) | 642 (87.5) | 321 (93.9) |        |
| Four doses                                   | 13 (2.7)   | 92 (12.5)  | 21 (6.1)   |        |
| Post-vaccination adverse effects             |            |            |            | 0.291  |
| None, n (%)                                  | 383 (80.6) | 579 (78.9) | 256 (74.9) |        |
| Local, n (%)                                 | 81 (17.1)  | 138 (18.8) | 75 (21.9)  |        |
| Systemic or severe, n (%)                    | 11 (2.3)   | 17 (2.3)   | 11 (3.2)   |        |
| <b>Perception of future COVID-19</b>         |            |            |            |        |
| There will be a future wave in 2023          |            |            |            | <0.001 |
| Agree, n (%)                                 | 161 (33.9) | 348 (47.4) | 140 (40.9) |        |
| Uncertain, n (%)                             | 258 (54.3) | 232 (31.6) | 143 (41.8) |        |
| Disagree, n (%)                              | 56 (11.8)  | 154 (21.0) | 59 (17.3)  |        |
| Future COVID -19 will be similar to flu      |            |            |            | <0.001 |
| Agree, n (%)                                 | 197 (41.5) | 331 (45.1) | 125 (36.5) |        |
| Uncertain, n (%)                             | 201 (42.3) | 215 (29.3) | 142 (41.5) |        |
| Disagree, n (%)                              | 77 (16.2)  | 188 (25.6) | 75 (21.9)  |        |
| I will get a future COVID-19 in 2023         |            |            |            | <0.001 |
| Agree, n (%)                                 | 141 (29.7) | 310 (42.2) | 125 (36.5) |        |
| Uncertain, n (%)                             | 232 (48.8) | 300 (40.9) | 138 (40.4) |        |
| Disagree, n (%)                              | 102 (21.5) | 124 (16.9) | 79 (23.1)  |        |
| My future COVID-19 will need hospitalization |            |            |            | 0.129  |
| Agree, n (%)                                 | 8 (1.7)    | 8 (1.1)    | 5 (1.5)    |        |
| Uncertain, n (%)                             | 98 (20.6)  | 118 (16.1) | 55 (16.1)  |        |
| Disagree, n (%)                              | 369 (77.7) | 608 (82.9) | 282 (82.4) |        |
| CBV would terminate COVID-19 pandemic        |            |            |            | <0.001 |
| Agree, n (%)                                 | 35 (7.4)   | 52 (7.1)   | 34 (9.9)   |        |
| Uncertain, n (%)                             | 231 (48.6) | 220 (30.0) | 139 (40.6) |        |
| Disagree, n (%)                              | 209 (44.0) | 462 (62.9) | 169 (49.4) |        |
| CBV would prevent future infection           |            |            |            | <0.001 |
| Agree, n (%)                                 | 93 (19.6)  | 196 (26.7) | 93 (27.2)  |        |
| Uncertain, n (%)                             | 266 (56.0) | 272 (37.1) | 148 (43.3) |        |
| Disagree, n (%)                              | 116 (24.4) | 266 (36.2) | 101 (29.5) |        |

|                                         |            |            |            |        |
|-----------------------------------------|------------|------------|------------|--------|
| CBV would prevent severe infection      |            |            |            | <0.001 |
| Agree, n (%)                            | 196 (41.3) | 393 (53.5) | 171 (50.0) |        |
| Uncertain, n (%)                        | 220 (46.3) | 230 (31.3) | 131 (38.3) |        |
| Disagree, n (%)                         | 59 (12.4)  | 111 (15.1) | 40 (11.7)  |        |
| Self-perception of CBV                  |            |            |            |        |
| CBV is necessary for healthcare workers |            |            |            | <0.001 |
| Agree, n (%)                            | 204 (42.9) | 364 (49.6) | 176 (51.5) |        |
| Uncertain, n (%)                        | 182 (38.3) | 180 (24.5) | 103 (30.1) |        |
| Disagree, n (%)                         | 89 (18.7)  | 190 (25.9) | 63 (18.4)  |        |
| CBV is necessary for the public         |            |            |            | <0.001 |
| Agree, n (%)                            | 146 (30.7) | 266 (36.2) | 121 (35.4) |        |
| Uncertain, n (%)                        | 263 (55.4) | 285 (38.8) | 153 (44.7) |        |
| Disagree, n (%)                         | 66 (13.9)  | 183 (24.9) | 68 (19.9)  |        |
| I think CBV is safe                     |            |            |            | <0.001 |
| Agree, n (%)                            | 180 (37.9) | 420 (57.3) | 174 (50.9) |        |
| Uncertain, n (%)                        | 287 (60.4) | 296 (40.3) | 155 (45.3) |        |
| Disagree, n (%)                         | 8 (1.7)    | 18 (2.5)   | 13 (3.8)   |        |
| Acceptance of a future CBV              | 235 (49.5) | 451 (61.4) | 217 (63.5) | <0.001 |
| Concerns about effectiveness            | 142 (29.9) | 287 (39.1) | 131 (38.3) | 0.003  |
| Concerns about safety                   | 116 (24.4) | 244 (33.2) | 128 (37.4) | <0.001 |

\*Chronic disease = Any of the following: hypertension, hyperlipidemia, diabetes, chronic heart disease, immune disease, and tumor

Abbreviation: BMI = body mass index; COVID-19 = coronavirus disease 2019; CBV = COVID-19 booster dose vaccine; IQR = interquartile range; SD = standard deviation;
